# Supplementary material for: Larval Retention and Homing Behaviour Shape the Genetic Structure of the Bullet Tuna (Auxis rochei) in the Mediterranean Sea
Source: MDPI journal article supplement (doi:10.3390/fishes7050300), 2022-10-21
Supplement: s1 [file s1]

# Larval retention and homing behaviour shape the genetic structure of the Bullet tuna (*Auxis rochei*) in the Mediterranean Sea.

**Authors:** Judith Ollé-Vilanova, Núria Pérez-Bielsa, Rosa M. Araguas, Núria Sanz, Sámar Saber, David Macías, Jordi Viñas

## Supplementary Tables and Figures

**Supplementary Table S1** Microsatellites descriptions and multiplex assignment. Total number of alleles per locus ( $k$ ), annealing temperature ( $T^a$ ). Table modified from Catanese et al., 2007 [22].

| Locus   | Repeat motif                                                   | Primer sequence (5'-3')                                                    | $k$ | Allele size range (bp) | $T^a$ | Multiplex |
|---------|----------------------------------------------------------------|----------------------------------------------------------------------------|-----|------------------------|-------|-----------|
| Aro1-3  | (TG) <sub>15</sub> (TCAC)(TG) <sub>4</sub>                     | F: PET-GCTTGTGCTTTGATTTACACGACCAG<br>R: ACAGACTTATTATTGTGTCAGCGGTGATTT     | 16  | 135-166                | 60    | 2         |
| Aro1-10 | (CA) <sub>4</sub> (CTCA) <sub>3</sub> (CA) <sub>23</sub>       | F: PET-CCCACCCACCCAGCCCTTCC<br>R: TCATCCCTTGTTACCTGCGTTTCTATTTTC           | 36  | 168-272                | 60    | 2         |
| Aro1-59 | (CA) <sub>12</sub>                                             | F: PET-CTACGTGCATGTCAGGTTGGATTCA<br>R: TTGTCTAAGTTTTTCTCCTGTGCTTTTATTGGTC  | 34  | 112-182                | 55    | 1         |
| Aro2-15 | (CA) <sub>12</sub> (C)(CA) <sub>8</sub> (CTA)(CA) <sub>4</sub> | F: FAM-CCATTTTTTCTCAAACCAAACCTGCCATT<br>R: GTGGGTGTGTTGTAAACTCTGAGCAGGTGT  | 40  | 135-217                | 58    | 2         |
| Aro2-38 | (TTCTC) <sub>9</sub> (CTCTC)(TTCTC) <sub>9</sub>               | F: VIC-CTGACCAACCAGTGCGAGGTGA<br>R: GCAGTAATACATTAAAGGAATAAATCAGACCACA     | 25  | 131-276                | 58    | 1         |
| Aro2-40 | (TC) <sub>22</sub> (TT)(TC) <sub>7</sub> (AC) <sub>5</sub>     | F: NED-TCGCAGTGCTAAAAAACATCCTTGTAAGTG<br>R: CATTCTCTTGAAGGCTGGGTTCTCTTTCT  | 29  | 135-205                | 58    | 1         |
| Aro3-37 | (TTCTC) <sub>20</sub>                                          | F: FAM-CTTTATATTGGCAAGAGTATTGTTCACTCATTT<br>R: TTGAGCCCACATGGTTGATAGCAGGAT | 23  | 92-202                 | 55    | 1         |
| Aro4-13 | (CT) <sub>4</sub> (CC)(CT) <sub>16</sub>                       | F: NED-AATCCATCCATCACACACAGCCAGA<br>R: TTAAGTGTATGTGTTTGAGAGACAGAGCGAGA    | 38  | 107-191                | 65    | 2         |

**Supplementary Table S2** Results for the MICROCHECKER for the eight microsatellite loci. Nulls alleles frequency estimation based on the method from Oosterhout implemented in MICROCHECKER. In bold, statistical significant frequencies (\*p<0.05; \*\*p<0.01; \*\*\*p<0.001)

|                     | Aro 3-37 | Aro 2-38           | Aro 2-40 | Aro 1-59 | Aro 2-15          | Aro 4-13           | Aro 1-3           | Aro 1-10         |
|---------------------|----------|--------------------|----------|----------|-------------------|--------------------|-------------------|------------------|
| Olhão               | -        | <b>(0.252) ***</b> | -        | -        | -                 | (0.048)            | <b>(0.159) **</b> | -                |
| Strait of Gibraltar | -        | <b>(0.197) ***</b> | -        | -        | -                 | -                  | <b>(0.205) **</b> | -                |
| Málaga              | -        | <b>(0.359) ***</b> | -        | -        | -                 | (0,083)            | -                 | (0.095)          |
| Cartagena           | -        | <b>(0.279) ***</b> | -        | -        | -                 | (0.058)            | -                 | (0.088)          |
| Valencia            | -        | <b>(0.283) ***</b> | -        | -        | -                 | -                  | -                 | -                |
| Tarragona           | -        | <b>(0.394) ***</b> | -        | -        | -                 | (0.088)            | (0.064)           | (0.039)          |
| Alger               | -        | <b>(0.371) ***</b> | -        | -        | <b>(0.134) **</b> | <b>(0.209) ***</b> | -                 | -                |
| Mahdia              | -        | <b>(0.319) ***</b> | -        | -        | -                 | <b>(0.263) ***</b> | -                 | <b>(0.140) *</b> |

**Supplementary Table S3**  $F_{ST}$  pairwise comparisons for the 7 microsatellites loci. Lower diagonal results from FreeNA not using ENA. Upper diagonal  $F_{ST}$  using ENA (from FreeNA)

|                     | Olhão | Strait of Gibraltar | Málaga | Cartagena | Valencia | Tarragona | Alger | Mahdia |
|---------------------|-------|---------------------|--------|-----------|----------|-----------|-------|--------|
| Olhão               |       | 0.003               | 0.001  | 0.002     | 0.003    | 0.004     | 0.012 | 0.011  |
| Strait of Gibraltar | 0.002 |                     | 0.003  | 0.000     | 0.005    | 0.000     | 0.017 | 0.012  |
| Málaga              | 0.002 | 0.002               |        | 0.001     | 0.001    | 0.003     | 0.014 | 0.015  |
| Cartagena           | 0.003 | 0.000               | 0.000  |           | 0.000    | 0.001     | 0.015 | 0.007  |
| Valencia            | 0.002 | 0.004               | 0.000  | 0.000     |          | 0.006     | 0.017 | 0.013  |
| Tarragona           | 0.004 | 0.000               | 0.002  | 0.001     | 0.005    |           | 0.017 | 0.017  |
| Alger               | 0.015 | 0.018               | 0.016  | 0.017     | 0.018    | 0.019     |       | 0.010  |
| Mahdia              | 0.015 | 0.014               | 0.019  | 0.011     | 0.016    | 0.021     | 0.011 |        |

**Supplementary Table S4** Locus by locus AMOVA. In bold loci with statistically significant p-values in the  $F_{ST}$ 

| Locus          | Among Populations |          |                |                | Within Populations |            |                |                 | Fixation index |                |
|----------------|-------------------|----------|----------------|----------------|--------------------|------------|----------------|-----------------|----------------|----------------|
|                | <i>SSD</i>        | d.f.     | <i>Va</i>      | % variation    | <i>SSD</i>         | d.f.       | <i>Vb</i>      | % variation     | $F_{ST}$       | <i>P-value</i> |
| Aro3-37        | 3.61384           | 7        | 0.00082        | 0.17767        | 250.67783          | 544        | 0.4608         | 99.82233        | 0.002          | 0.2356         |
| Aro2-40        | 3.04366           | 7        | 0.00065        | 0.1662         | 212.60308          | 544        | 0.39081        | 99.8338         | 0.002          | 0.3040         |
| <b>Aro1-59</b> | <b>6.30476</b>    | <b>7</b> | <b>0.00648</b> | <b>1.38202</b> | <b>251.57567</b>   | <b>544</b> | <b>0.46246</b> | <b>98.61798</b> | <b>0.014</b>   | <b>0.0000</b>  |
| <b>Aro2-15</b> | <b>9.84928</b>    | <b>7</b> | <b>0.01407</b> | <b>2.99563</b> | <b>247.85905</b>   | <b>544</b> | <b>0.45562</b> | <b>97.00437</b> | <b>0.030</b>   | <b>0.0000</b>  |
| <b>Aro4-13</b> | <b>8.32219</b>    | <b>7</b> | <b>0.01056</b> | <b>2.1753</b>  | <b>258.32636</b>   | <b>544</b> | <b>0.47486</b> | <b>97.8247</b>  | <b>0.022</b>   | <b>0.0000</b>  |
| Aro1-3         | 3.90206           | 7        | 0.00204        | 0.48268        | 228.35337          | 544        | 0.41977        | 99.51732        | 0.005          | 0.2327         |
| <b>Aro1-10</b> | <b>9.3007</b>     | <b>7</b> | <b>0.01282</b> | <b>2.70359</b> | <b>251.06343</b>   | <b>544</b> | <b>0.46151</b> | <b>97.29641</b> | <b>0.027</b>   | <b>0.0000</b>  |
